# Supplementary material for: Highly Efficient Capture of Volatile Iodine by Conjugated Microporous Polymers Constructed Using Planar 3- and 4-Connected Organic Monomers
Source: MDPI journal article supplement (doi:10.3390/molecules29102242), 2024-05-10
Supplement: s1 [file s1]

# Highly Efficient Capture of Volatile Iodine by Conjugated Microporous Polymers Constructed using Planar 3- and 4-Connected Organic Monomers

Chaohui Li <sup>1,†</sup>, Qianqian Yan <sup>1,†</sup>, Huanjun Xu <sup>2</sup>, Siyu Luo <sup>1</sup>, Hui Hu <sup>1,\*</sup>, Shenglin Wang <sup>1,\*</sup>, Xiaofang Su <sup>1</sup>, Songtao Xiao <sup>3</sup> and Yanan Gao <sup>1</sup>

<sup>1</sup> Key Laboratory of Ministry of Education for Advanced Materials in Tropical Island Resources, Hainan University, No 58, Renmin Avenue, Haikou 570228, China

<sup>2</sup> School of Science, Qiongtai Normal University, Haikou 571127, China

<sup>3</sup> China Institute of Atomic Energy, Beijing 102413, China

\* Correspondence: hhu@hainanu.edu.cn (H.H); wangshenglin@hainanu.edu.cn (S.W)

<sup>†</sup> C. L. and Q. Y. contributed equally to this work.

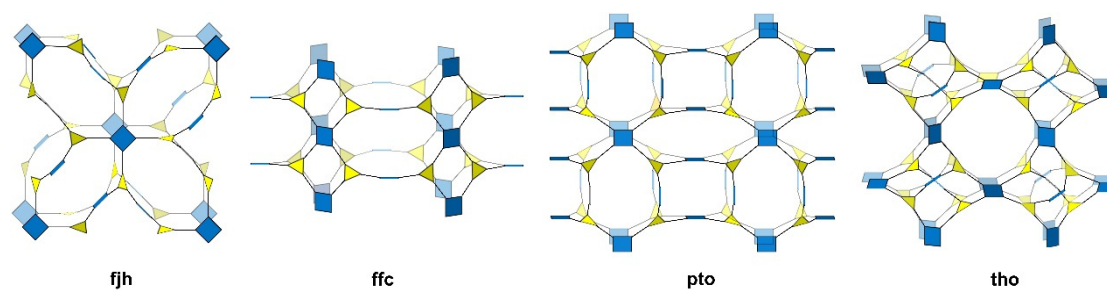

**Figure S1.** The possible 3D topological structures through the combination of 4-connected and 3-connected monomers.

## Synthesis of 1,3,5-tris(4-formylphenyl)benzene (TFPB)

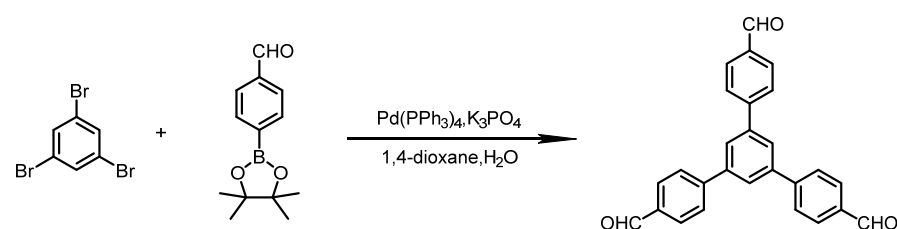

TFPB was synthesized according to the reported method in the literature.<sup>[1]</sup> Typically, a mixture of 4-(4,4,5,5-tetramethyl-1,3,2-dioxaborolan-2-yl)benzaldehyde (4.64 g, 20 mmol), 1,3,5-tribromobenzene (1.57 g, 5 mmol), Pd(PPh<sub>3</sub>)<sub>4</sub> (288.9 mg, 0.25 mmol), potassium phosphate (7.43 g, 35 mmol), 1,4-dioxane (80.0 mL) and distilled water (8.0 mL) was stirred at 90 °C under a N<sub>2</sub> atmosphere for 24 h. After cooling down to room temperature, the solvent was removed under vacuum and the residue was purified by flash column chromatography (petroleum ether/ethyl acetate/dichloromethane (10/1; 4/1); silica gel, 300-400 mesh) to give TFPB as a white solid (1.7 g, 87%). <sup>1</sup>H NMR (400 MHz, CDCl<sub>3</sub>): δ 10.07 (s, 3H), 8.03 (d, J = 8.2 Hz, 6H), 7.91 (s, 3H), 7.88 (d, J = 8.2 Hz, 6H). The <sup>1</sup>H NMR spectrum of TFPB is shown in Figure S2.

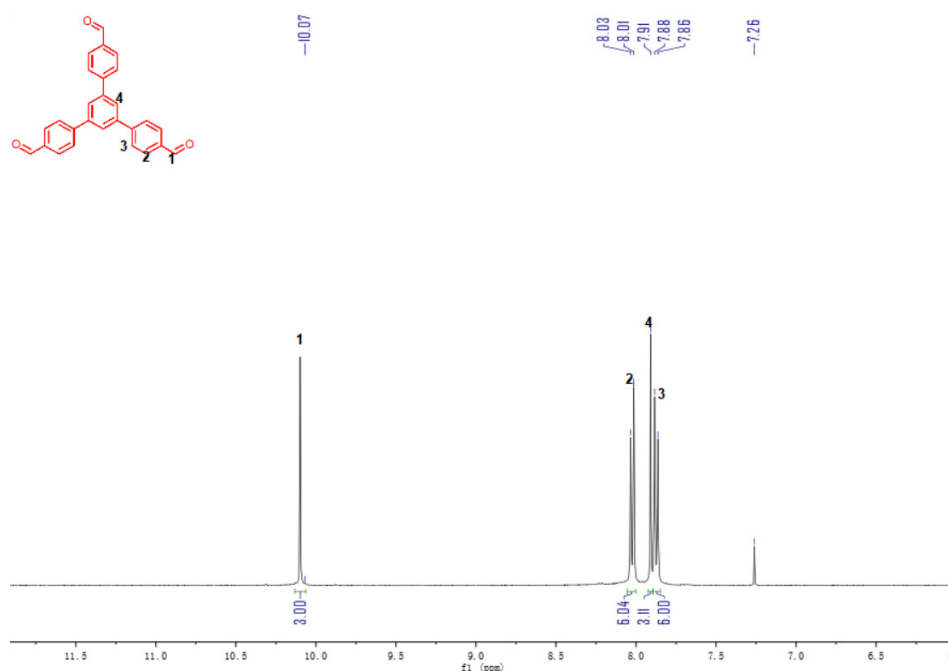

**Figure S2.**  $^1\text{H}$  NMR spectrum of TFPB.

*Synthesis of 4,4',4''-(1,3,5-triazine-2,4,6-triyl)tris[benzaldehyde] (TATBA)*

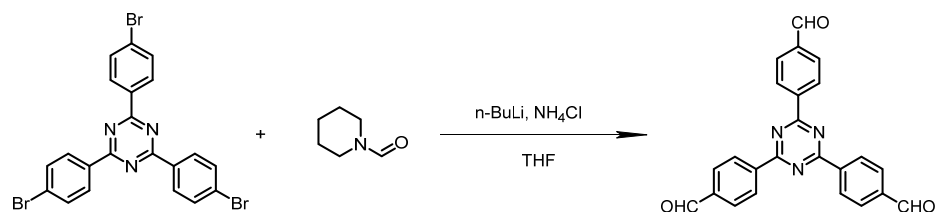

TAPBA was synthesized according to the reported method in the literature.<sup>[2]</sup> To a suspension of 2,4,6-tris(4-bromophenyl)-1,3,5-triazine (0.50 g, 0.92 mmol, 1.0 eq.) in THF (50.0 mL), *n*-BuLi (2.5 M in hexane, 1.2 mL, 3.0 mmol, 3.3 eq.) was added dropwise at  $-78^\circ\text{C}$ . The mixture was stirred at  $-78^\circ\text{C}$  for 90 min, then 1-formylpiperidine (0.34 mL, 3.0 mmol, 3.3 eq.) was added dropwise at  $-78^\circ\text{C}$ . The mixture was stirred at  $-78^\circ\text{C}$  for 30 min and allowed to warm to room temperature. Aqueous concentrated  $\text{NH}_4\text{Cl}$  solution (1.0 mL) was added and the solvent was removed under reduced pressure. The residue was suspended in a mixture of EtOH (3.0 mL) and water (3.0 mL). Suction filtration of the suspension and washing with water (10.0 mL) and EtOH (10.0 mL) afforded TAPBA (0.35 g, 0.91 mmol, 97 %) as an off-white solid.  $^1\text{H}$  NMR (400 MHz,  $\text{CDCl}_3$ ):  $\delta$  = 10.21 (s, 3H, H-1), 8.95 (d,  $J$  = 8.2 Hz, 6H, H-6), 8.16–8.11 (m, 6H, H-5) ppm.

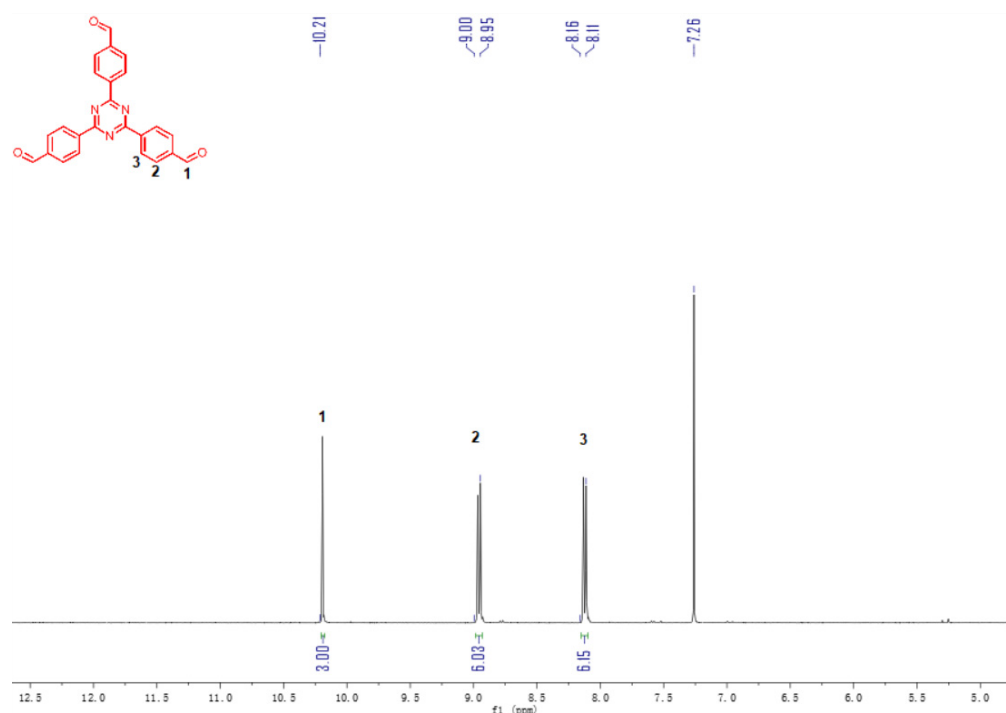

Figure S3. <sup>1</sup>H NMR spectrum of TAPBA.

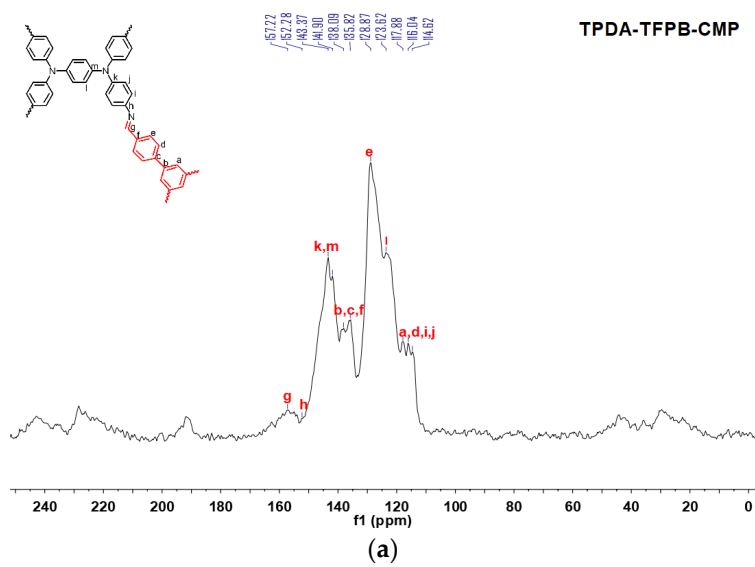

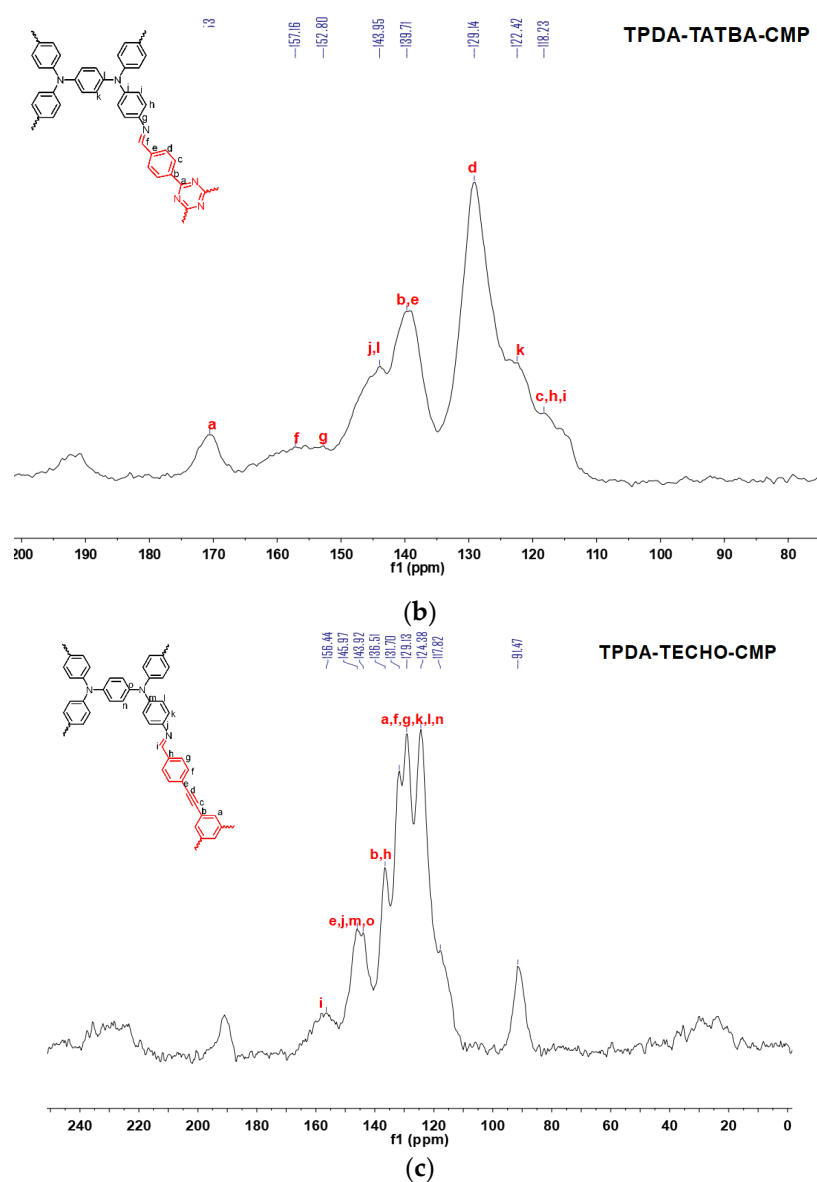

**Figure S4.**  $^{13}\text{C}$  CP/MAS NMR spectra of TPDA-TFPB-CMP (a), TPDA-TATBA-CMP (b), and TPDA-TECHO-CMP (c).

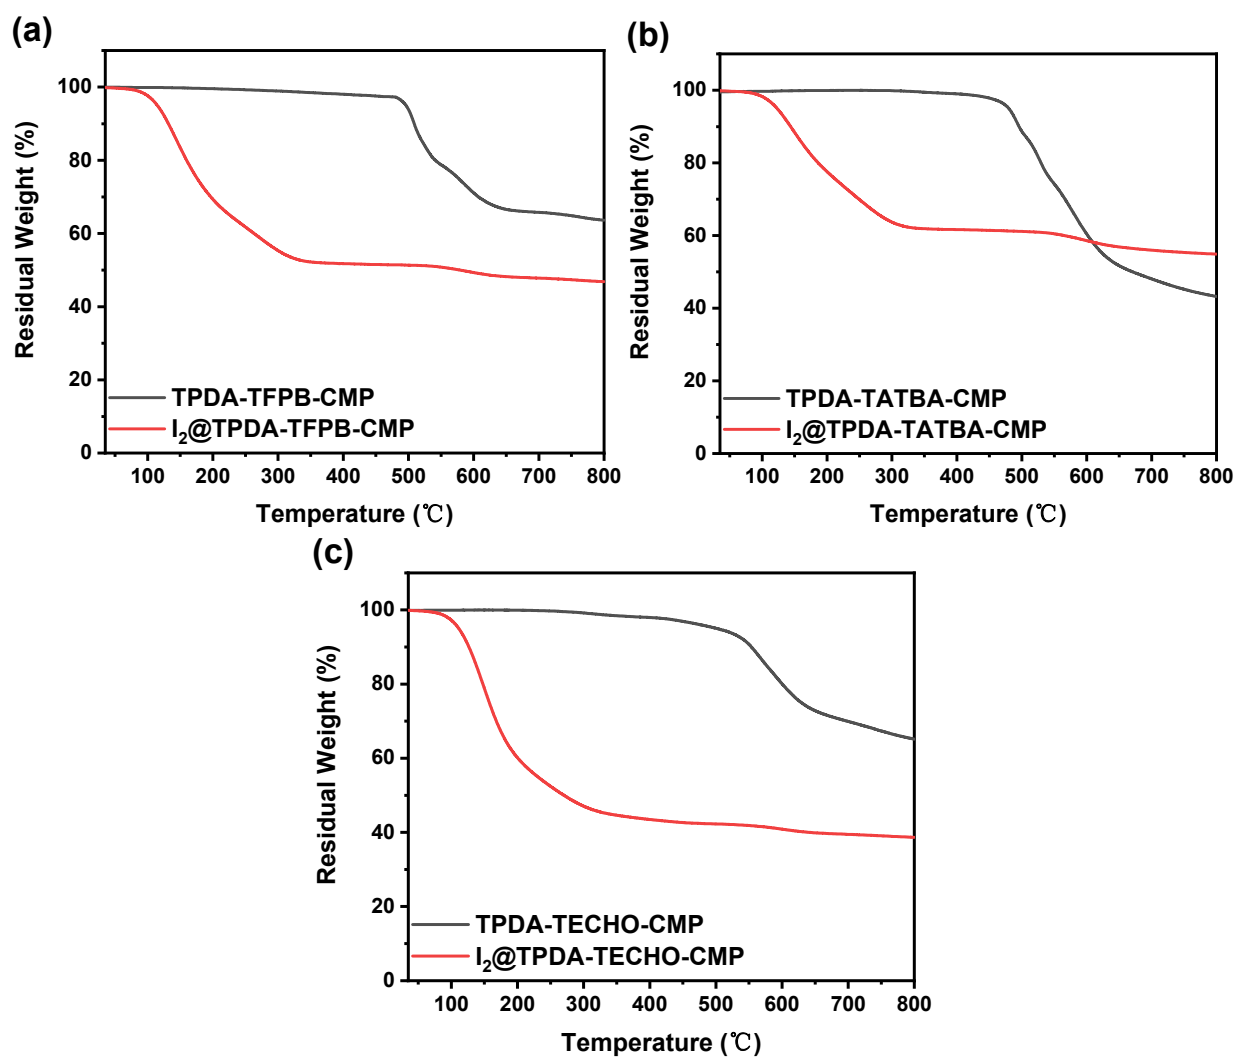

**Figure S5.** TGA curves of TPDA-TFPB-CMP and I<sub>2</sub>@TPDA-TFPB-CMP (a), TPDA-TATBA-CMP and I<sub>2</sub>@TPDA-TATBA-CMP (b), and TPDA-TECHO-CMP and I<sub>2</sub>@TPDA-TECHO-CMP (c).

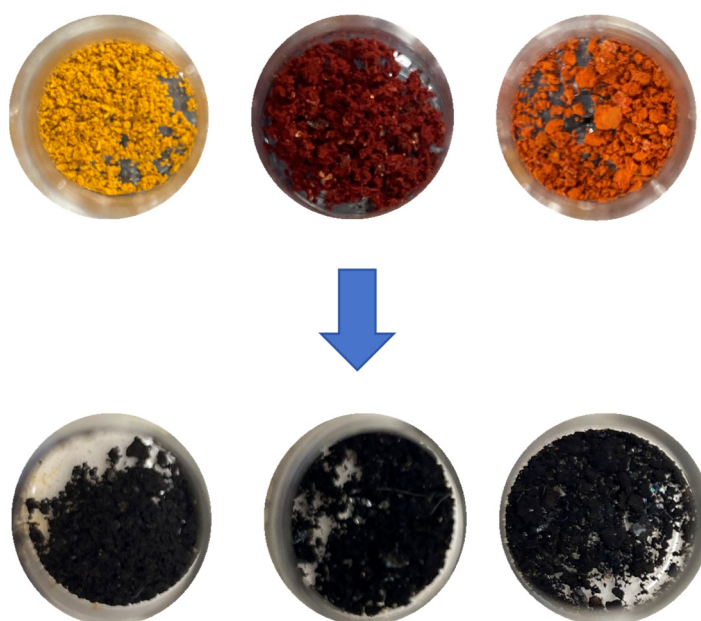

**Figure S6.** The color change of TPDA-TFPB-CMP (left), TPDA-TATBA-CMP (middle), and TPDA-TECHO-CMP (right) before and after I<sub>2</sub> adsorption.

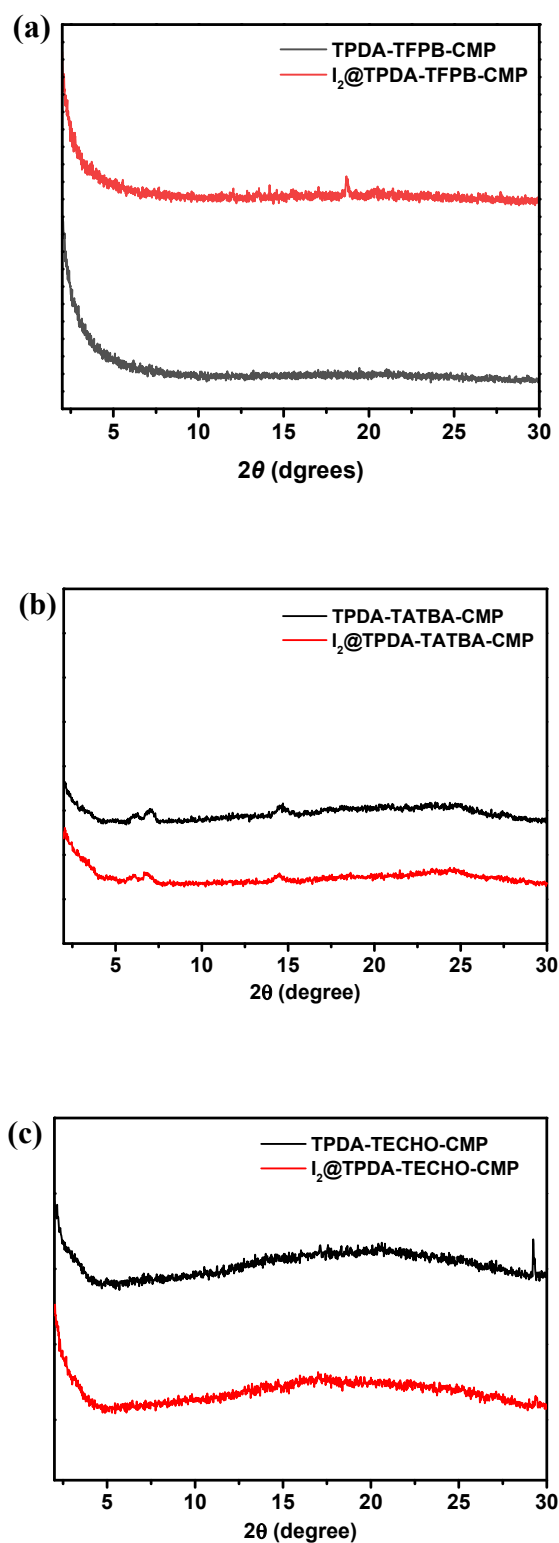

**Figure S7.** PXRD patterns of TPDA-TFPB-CMP and  $I_2$ @TPDA-TFPB-CMP (a) TPDA-TATBA-CMP and  $I_2$ @TPDA-TATBA-CMP (b), and TPDA-TECHO-CMP and  $I_2$ @TPDA-TECHO-CMP (c).

*Iodine vapor adsorption experimental procedure.*

5.0 mg of CMP adsorbent was loaded in a small open vial and transferred into a big chamber. Excess of iodine powder was put at the bottom of the chamber, that was sealed tightly and moved to a convection oven (348 K) for iodine vapor adsorption experiment

under ambient pressure. The weight of the vial that loaded CMPs was recorded at different exposure times and the adsorption curves of the samples were thus plotted.

The iodine adsorption capacity of CMPs was evaluated according to the following equation:

$$\alpha = \frac{(m_2 - m_1)}{m_1} \quad (1)$$

where  $\alpha$  is the iodine vapor uptake capacity, and  $m_1$  and  $m_2$  represent the weight of CMP sample before and after the iodine adsorption.

**Table S1.** Comparison of representatively reported adsorbents with our work for iodine vapor adsorption under atmospheric pressure.

| Adsorbents     | $S_{\text{BET}}$<br>( $\text{m}^2 \text{g}^{-1}$ ) | Pore volume<br>( $\text{cm}^3 \text{g}^{-1}$ ) | Temperature<br>( $^{\circ}\text{C}$ ) | Iodine adsorption capacity<br>( $\text{g g}^{-1}$ ) | Ref.      |
|----------------|----------------------------------------------------|------------------------------------------------|---------------------------------------|-----------------------------------------------------|-----------|
| iCOFs-AB-50    | 1390                                               | 1.21                                           | 75                                    | 10.21                                               | (3)       |
| iCOFs-AB-33    | 1580                                               | 1.39                                           | 75                                    | 9.00                                                | (3)       |
| iCOFs-AB-67    | 1253                                               | 0.80                                           | 75                                    | 8.51                                                | (3)       |
| JUC-561        | 2359                                               | 1.92                                           | 75                                    | 8.19                                                | (4)       |
| TPDA-TFPB-CMP  | 284                                                | 0.26                                           | 75                                    | 6.48                                                | This work |
| TPDA-TATBA-CMP | 427                                                | 0.28                                           | 75                                    | 6.37                                                | This work |
| QTD-COF-V      | n.a.                                               | n.a.                                           | 75                                    | 6.29                                                | (5)       |
| TPB-DMTP       | 1927                                               | 1.28                                           | 77                                    | 6.26                                                | (6)       |
| TPDA-TECHO-CMP | 262                                                | 0.22                                           | 75                                    | 6.25                                                | This work |
| TJNU-201       | 2510                                               | n.a.                                           | 77                                    | 5.625                                               | (7)       |
| TPT-BD-COF     | 109                                                | 0.3                                            | 75                                    | 5.43                                                | (8)       |
| TTA-TTB COF    | 1733                                               | 1.01                                           | 77                                    | 4.95                                                | (6)       |
| TTPPA          | 512.39                                             | 0.13                                           | 77                                    | 4.90                                                | (9)       |
| TJNU-202       | 714                                                | n.a.                                           | 77                                    | 4.82                                                | (7)       |
| SIOC-COF-7     | 618                                                | 0.41                                           | 75                                    | 4.81                                                | (10)      |
| TPE-TPDA-CMP   | 634                                                | 0.63                                           | 75                                    | 4.68                                                | (11)      |
| ETTA-PyTTA-COF | 1519                                               | 0.82                                           | 75                                    | 4.6                                                 | (12)      |
| TPT-DHBD50 COF | 124                                                | 0.19                                           | 75                                    | 4.3                                                 | (8)       |
| TPT-DHBD75 COF | 157                                                | 0.19                                           | 75                                    | 4.12                                                | (8)       |
| NDB-H          | 116.9                                              | 0.13                                           | 75                                    | 4.43                                                | (13)      |
| NDB-S          | 56.5                                               | 0.11                                           | 75                                    | 4.25                                                | (13)      |
| POP-T          | 18.3                                               | 0.027                                          | 75                                    | 3.94                                                | (14)      |
| POP-2          | 41                                                 | n.a.                                           | 80                                    | 3.82                                                | (15)      |
| CalPOF-2       | 154                                                | n.a.                                           | 75                                    | 4.06                                                | (16)      |
| COF-320        | 2400                                               | 0.81                                           | 75                                    | 4.0                                                 | (17)      |
| Meso-COF-3     | 982                                                | 0.84                                           | 75                                    | 4.0                                                 | (17)      |
| TPT-DHBD-COF   | 297                                                | 0.54                                           | 75                                    | 3.88                                                | (8)       |
| CTF-CTTD-500   | 1334                                               | 1.40                                           | 78                                    | 3.87                                                | (18)      |
| KOH-AC         | 1973                                               | 1.15                                           | 77                                    | 3.76                                                | (19)      |
| TPE-TAPP-CMP   | 454.1                                              | 0.58                                           | 75                                    | 3.67                                                | (11)      |
| CTF-CTTD-400   | 1684                                               | 1.44                                           | 78                                    | 3.57                                                | (18)      |
| CalPOF-3       | 91                                                 | n.a.                                           | 75                                    | 3.53                                                | (16)      |
| Micro-COF-2    | 1056                                               | 0.71                                           | 75                                    | 3.5                                                 | (17)      |
| COF-300        | 1360                                               | 0.72                                           | 75                                    | 3.5                                                 | (17)      |
| HCMP-3         | 82                                                 | 0.08                                           | 85                                    | 3.36                                                | (20)      |
| Meso-COF-4     | 926                                                | 1.01                                           | 75                                    | 3.3                                                 | (17)      |
| TPE-PyTTA-CMP  | 669.9                                              | 0.4                                            | 75                                    | 3.10                                                | (11)      |
| MIL-101        | 3134                                               | 1.52                                           | 77                                    | 3.02                                                | (21)      |
| AzoPPN         | 400                                                | 0.68                                           | 77                                    | 2.9                                                 | (22)      |
| Micro-COF-1    | 816                                                | 0.59                                           | 75                                    | 2.9                                                 | (23)      |
| PAN3           | 194                                                | 0.15                                           | 75                                    | 2.81                                                | (23)      |

|                                                                                                                                  |       |       |     |             |      |
|----------------------------------------------------------------------------------------------------------------------------------|-------|-------|-----|-------------|------|
| PAF-24                                                                                                                           | 136   | n.a.  | 75  | 2.76        | (24) |
| TTA-TFB COF                                                                                                                      | 1163  | 0.55  | 75  | 2.76        | (6)  |
| PAF-23                                                                                                                           | 82    | n.a.  | 75  | 2.71        | (24) |
| PAF-25                                                                                                                           | 262   | n.a.  | 75  | 2.60        | (24) |
| Cg-5C                                                                                                                            | 1200  | 2.3   | 25  | 2.39        | (25) |
| Azo-Trip                                                                                                                         | 510.4 | 0.47  | 80  | 2.38        | (26) |
| TPT-TAPB-COF                                                                                                                     | 957   | 0.57  | 78  | 2.25        | (27) |
| NiMoS chalcogels                                                                                                                 | 490   | n.a.  | 60  | 2.25        | (28) |
| BDP-CPP-2                                                                                                                        | n.a.  | n.a.  | 75  | 2.23        | (29) |
| SCMP-2                                                                                                                           | n.a.  | n.a.  | 60  | 2.22        | (30) |
| TPT-Azine-COF                                                                                                                    | 1020  | 0.65  | 78  | 2.19        | (27) |
| MOF-808                                                                                                                          | 1930  | 0.82  | 80  | 2.18        | (31) |
| CMP-E1                                                                                                                           | n.a.  | n.a.  | 75  | 2.15        | (24) |
| CMPN-3                                                                                                                           | 1368  | 2.36  | 75  | 2.08        | (32) |
| NiP-CMP                                                                                                                          | 2630  | 2.288 | 80  | 2.02        | (33) |
| NTP                                                                                                                              | 1067  | n.a.  | 75  | 1.80        | (34) |
| Cu-BTC                                                                                                                           | n.a.  | n.a.  | 75  | 1.75        | (35) |
| PAF-21                                                                                                                           | n.a.  | n.a.  | 75  | 1.52        | (24) |
| ZIF-8                                                                                                                            | 1837  | n.a.  | 80  | 1.25        | (36) |
| Ni(44dba) <sub>2</sub>                                                                                                           | n.a.  | n.a.  | RT  | 1.1         | (37) |
| POP-E                                                                                                                            | 37    | 0.058 | 75  | 3.49        | (14) |
| POP-P                                                                                                                            | 27.8  | 0.037 | 75  | 3.27        | (14) |
| BDP-CPP-1                                                                                                                        | 635   | 0.78  | 75  | 2.83        | (38) |
| BDP-CPP-2                                                                                                                        | 235   | 0.18  | 75  | 2.23        | (38) |
| Por-Py-CMP                                                                                                                       | 1014  | 0.81  | 77  | 1.30        | (39) |
| CMPN-2                                                                                                                           | 339   | 0.39  | 75  | 1.10        | (40) |
| CMPN-1                                                                                                                           | 230   | 0.14  | 75  | 0.97        | (40) |
| JUC-Z2                                                                                                                           | 2081  | 1.45  | 60  | 0.80        | (41) |
| PPy                                                                                                                              | 6     | n.a.  | 80  | 0.63        | (42) |
| Cg-5P                                                                                                                            | 957   | 1.62  | 25  | 0.87        | (43) |
| CF/COF monolith                                                                                                                  | 166   | n.a.  | 80  | 0.82        | (43) |
| HKUST-1                                                                                                                          | n.a.  | n.a.  | 75  | 0.636       | (44) |
| Polyurethane (PU1)                                                                                                               | n.a.  | n.a.  | 70  | 0.565       | (45) |
| [Zn <sub>3</sub> (DL-lac) <sub>2</sub> (pybz) <sub>2</sub> ] <sub>3</sub> (I <sub>2</sub> )                                      | 918.5 | n.a.  | 25  | 0.497       | (46) |
| 3D Cd (II)-triazole MOF                                                                                                          | n.a.  | n.a.  | 25  | 0.46        | (47) |
| {[Cu <sub>6</sub> (pybz) <sub>8</sub> (OH) <sub>2</sub> ] I <sub>5</sub> <sup>−</sup> I <sub>7</sub> <sup>−</sup> } <sub>n</sub> | n.a.  | n.a.  | 140 | 0.432       | (48) |
| CC3                                                                                                                              | n.a.  | n.a.  | 20  | 0.364       | (49) |
| [Fe <sub>3</sub> (HCOO) <sub>6</sub> ] (I <sub>2</sub> ) <sub>0.84</sub>                                                         | 385   | n.a.  | 25  | 0.328       | (50) |
| Ag-MOR                                                                                                                           | n.a.  | n.a.  | 75  | 0.28        | (51) |
| Ag@Zeolite Mordenites                                                                                                            | n.a.  | n.a.  | 95  | 0.275       | (52) |
| Ag@Mon-POF                                                                                                                       | 1230  | 1.46  | 70  | 0.25        | (53) |
| Macroporous resins                                                                                                               | n.a.  | n.a.  | <50 | 0.2-1.0     | (54) |
| AgX-silverexchanged faujasite                                                                                                    | n.a.  | n.a.  | 150 | 0.08-0.20   | (54) |
| AgZ-silver exchanged mordenite                                                                                                   | n.a.  | n.a.  | 150 | 0.17        | (54) |
| [Zn(C <sub>8</sub> H <sub>8</sub> O <sub>8</sub> )]·2H <sub>2</sub> O                                                            | n.a.  | n.a.  | 19  | 0.166       | (55) |
| AC-6120-silver impregnated silica gel                                                                                            | n.a.  | n.a.  | 130 | 0.135       | (55) |
| AgA-silver impregnated alumina                                                                                                   | n.a.  | n.a.  | 150 | 0.100-0.235 | (54) |

n.a: no data was given.



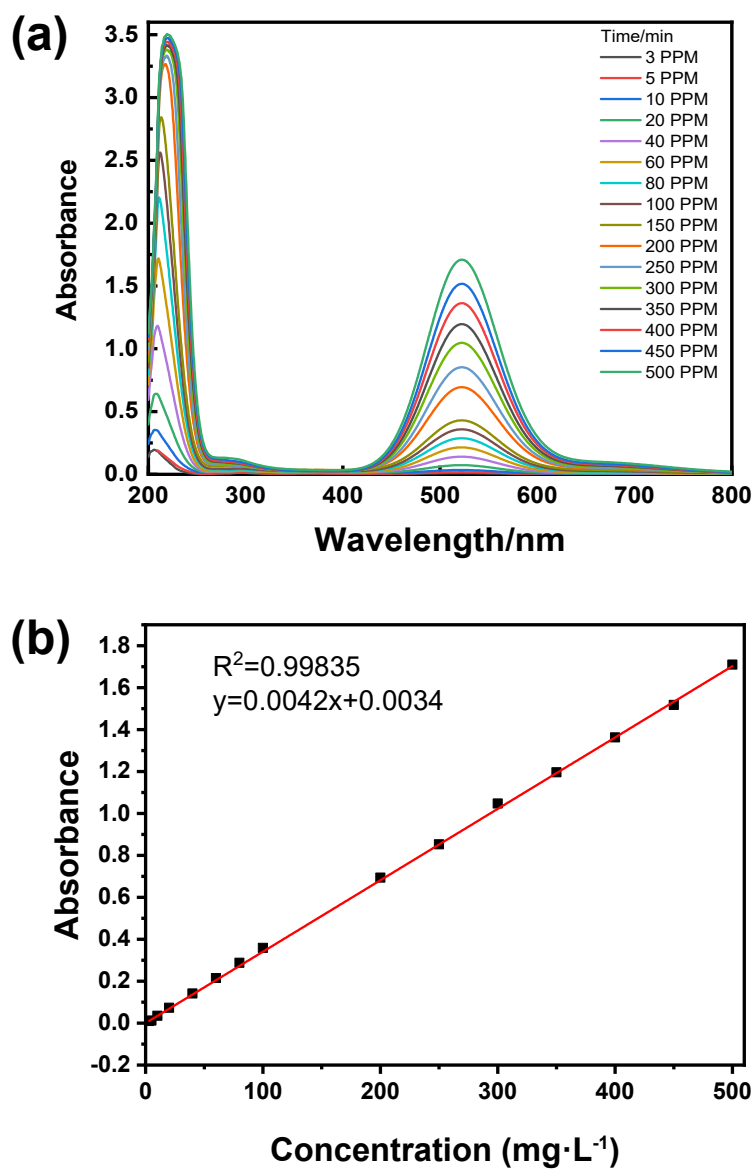

**Figure S8.** UV-vis spectra of n-hexane standard solutions of iodine with different concentration (a) and the corresponding calibration curve of absorbance versus iodine concentration established from UV-vis spectra (b) as shown in (a).

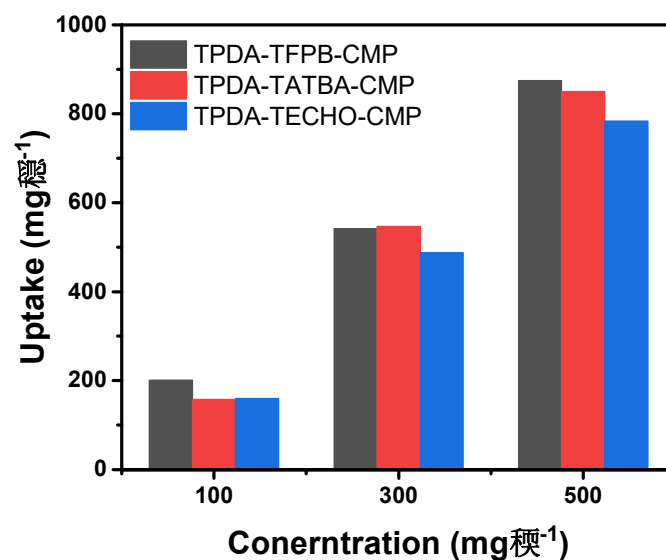

**Figure S9.** The I<sub>2</sub> adsorption behavior of the CMPs in n-hexane. The concentration of iodine in n-hexane solution is 100 mg L<sup>-1</sup>, 300 mg L<sup>-1</sup>, and 500 mg L<sup>-1</sup>, respectively.

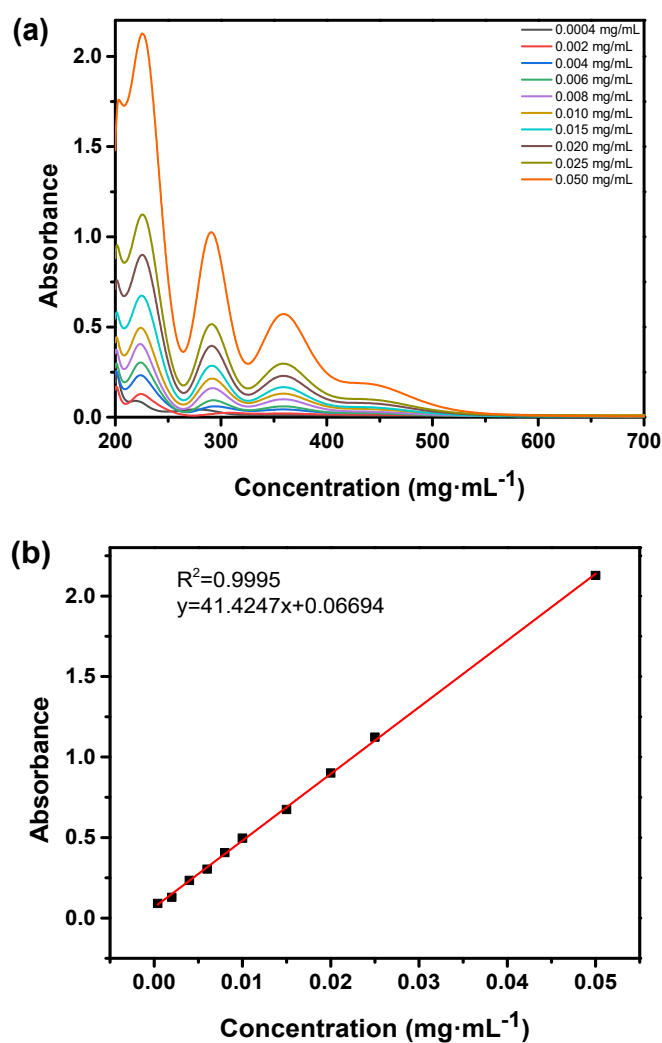

**Figure S10.** UV-vis spectra of methanol standard solutions of iodine with different concentration (a) and the corresponding calibration curve of absorbance versus iodine concentration established from UV-vis spectra (b) as shown in (a).

### Release behavior and reusability measurement.

Typically, the iodine saturated-adsorbed CMP sample (0.4 mg) was treated with methanol (3.0 mL) under stirring for a given time. The mixture was then separated and the collected supernatant was filtered with 0.22  $\mu\text{m}$  Millipore cellulose membrane before UV-vis absorption analysis. The release ratio ( $x$ ) of the CMPs was calculated as following equation:

$$x = \frac{CV}{m \frac{a}{a+1}} \times 100\% \quad (2)$$

where,  $C$  is the concentration of iodine released into methanol,  $V$  is the methanol volume,  $m$  is the mass of  $\text{I}_2$ -CMP sample, and  $a$  represents the iodine adsorption capability.

For reusability measurement, the iodine saturated-adsorbed CMP sample was treated with Soxhlet extraction to remove the iodine from  $\text{I}_2$ -TPDA-TFPB-CMP,  $\text{I}_2$ -TPDA-TATBA-CMP, and  $\text{I}_2$ -TPDA-TECHO-CMP with methanol completely, and the empty samples are dried at 80  $^{\circ}\text{C}$  for 48 hours. The empty CMPs were used for iodine vapor absorption for another adsorption cycle. This same process was repeated for five cycles.

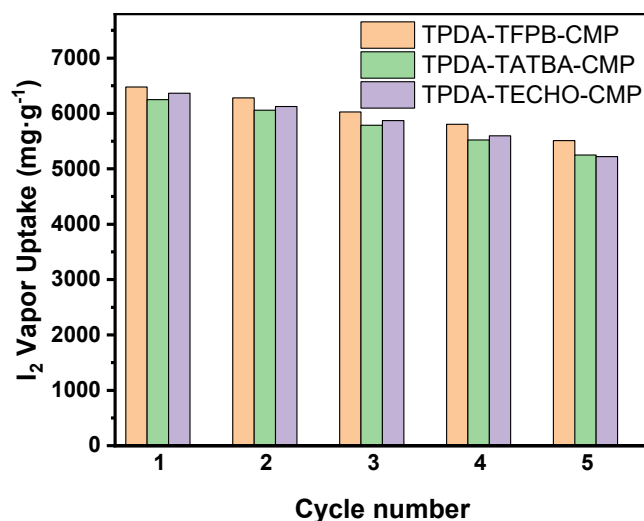

**Figure S11.** Recyclability of TPDA-TFPB-CMP, TPDA-TATBA-CMP, and TPDA-TECHO-CMP in iodine uptake.

### References

1. L. Grunenberg, G. Savasci, M. W. Terban, V. Duppel, I. Moudrakovski, M. Etter, R. E. Dinnebier, C. Ochsenfeld and B. V. Lotsch, *J Am Chem Soc*, 2021, 143, 3430–3438.
2. N. Wang, L. Feng, X. D. Xu and S. Feng, *Macromol Rapid Commun*, 2022, 43, e2100885.
3. Y. Xie, T. Pan, Q. Lei, C. Chen, X. Dong, Y. Yuan, J. Shen, Y. Cai, C. Zhou, I. Pinnau and Y. Han, *Angew. Chem. Int. Ed.* 2021, 60, 22432–22440.
4. J. H. Chang, H. Li, J. Zhao, X. Guan, C. Li, G. Yu, V. Valtchev, Y. Yan, S. Qiu and Q. Fang, *Chem Sci*, 2021, 12, 8452–8457.
5. X. Guo, Y. Li, M. Zhang, K. Cao, Y. Tian, Y. Qi, S. Li, K. Li, X. Yu and L. Ma, *Angew Chem Int Ed*, 2020, 59, 22697–22705.
6. P. Wang, Q. Xu, Z. Li, W. Jiang, Q. Jiang and D. Jiang, *Adv Mater*, 2018, 30, 1801991.
7. J. Li, H. Zhang, L. Zhang, K. Wang, Z. Wang, G. Liu, Y. Zhao and Y. Zeng, *J. Mater. Chem. A*, 2020, 8, 9523–9527.
8. X. Guo, Y. Tian, M. Zhang, Y. Li, R. Wen, X. Li, X. Li, Y. Xue, L. Ma, C. Xia and S. Li, *Chem. Mater*, 2018, 30, 2299–2308.
9. T. Geng, S. Ye, Z. Zhu and W. Zhang, *J. Mater. Chem. A*, 2018, 6, 2808–2816.
10. Z. J. Yin, S. Q. Xu, T. G. Zhan, Q. Y. Qi, Z. Q. Wu and X. Zhao, *Chem Commun (Camb)*, 2017, 53, 7266–7269.
11. S. Luo, Q. Yan, S. Wang, H. Hu, S. Xiao, X. Su, H. Xu and Y. Gao, *ACS Appl. Mater. Interfaces*, 2023, 15, 46408–46416.
12. Z. Wen, S. Wang, S. Fu, J. Qian, Q. Yan, H. Xu, K. Zuo, X. Su, C. Zeng and Y. Gao, *Chem Res Chinese U*, 2022, 38, 472–477.
13. Z. Guo, P. Sun, X. Zhang, J. Lin, T. Shi, S. Liu, A. Sun and Z. Li, *Chem Asian J*, 2018, 13, 2046–2053.
14. P. Tian, Z. Ai, H. Hu, M. Wang, Y. Li, X. Gao, J. Qian, X. Su, S. Xiao, H. Xu, F. Lu and Y. Gao, *Molecules*, 2022, 27, 5161.
15. X. Qian, B. Wang, Z. Q. Zhu, H. X. Sun, F. Ren, P. Mu, C. Ma, W. D. Liang and A. Li, *J Hazard Mater*, 2017, 338, 224–232.
16. K. Su, W. Wang, B. Li and D. Yuan, *ACS Sustain. Chem. Eng.*, 2018, 6, 17402–17409.

17. S. An, X. Zhu, Y. He, L. Yang, H. Wang, S. Jin, J. Hu and H. Liu, *Ind. Eng. Chem. Res.*, 2019, 58, 10495–10502.
18. Q. Jiang, H. Huang, Y. Tang, Y. Zhang and C. Zhong, *Ind. Eng. Chem. Res.*, 2018, 57, 15114–15121.
19. H. Sun, P. La, Z. Zhu, W. Liang, B. Yang, A. Li, *J. Mater. Sci.* 2015, 50, 7326.
20. Y. Liao, J. Weber, B. M. Mills, Z. Ren, C. F. J. Faul, *Macromolecules* 2016, 49, 6322.
21. Qi, B.; Liu, Y.; Zheng, T.; Gao, Q.; Yan, X.; Jiao, Y.; Yang, Y. *J. Solid State Chem.* 2018, 258, 49–55.
22. H. Li, X. Ding and B. H. Han, *Chem. Eur. J.*, 2016, 22, 11863–11868.
23. Ren, Y. Y.; Zhang, W.; Zhu, Y.; Wang, D. G.; Yu, G.; Kuang, G. C. *J. Appl. Polym. Sci.* 2018, 135, 46106.
24. Z. Yan, Y. Yuan, Y. Tian, D. Zhang, G. Zhu, *Angew. Chem. Int. Ed.* 2015, 54, 12733.
25. B. J. Riley, J. Chun, J. V. Ryan, J. Matyas, X. S. Li, D. W. Matson, S. K. Sundaram, D. M. Strachan, J. D. Vienna, *RSC Adv.* 2011, 1, 1704.
26. Q. Q. Dang, X. M. Wang, Y. F. Zhan and X. M. Zhang, *Polymer Chem*, 2016, 7, 643–647.
27. Y. Li, W. Chen, W. Hao, Y. Li and L. Chen, *ACS Appl. Nano Mater*, 2018, 1, 4756–4761.
28. K. S. Subrahmanyam, D. Sarma, C. D. Malliakas, K. Polychronopoulou, B. J. Riley, D. A. Pierce, J. Chun, M. G. Kanatzidis, *Chem. Mater.* 2015, 27, 2619.
29. Y. Zhu, Y. J. Ji, D. G. Wang, Y. Zhang, H. Tang, X. R. Jia, M. Song, G. Yu and G. C. Kuang, *J. Mater. Chem. A*, 2017, 5, 6622–6629.
30. X. Qian, Z. Q. Zhu, H. X. Sun, F. Ren, P. Mu, W. D. Liang, L. H. Chen, and A. Li, *ACS Appl. Mater. Interfaces*, 2016, 8, 21063–21069.
31. P. Chen, X. He, M. Pang, X. Dong, S. Zhao and W. Zhang, *ACS Appl. Mater. Interfaces*, 2020, 12, 20429–20439.
32. Y. Chen, H. Sun, R. Yang, T. Wang, C. Pei, Z. Xiang, Z. Zhu, W. Liang, A. Li, W. Deng, *J. Mater. Chem. A* 2015, 3, 87–91.
33. Sigen, Y. Zhang, Z. Li, H. Xia, M. Xue, X. Liu and Y. Mu, *Chem. Commun.*, 2014, 50, 8495–8498.
34. H. Ma, J. J. Chen, L. X. Tan, J. H. Bu, Y. H. Zhu, B. E. Tan, and C. Zhang, *ACS Macro Lett.*, 2016, 5, 1039–1043.
35. D. F. Sava, K. W. Chapman, M. A. Rodriguez, J. A. Greathouse, P. S. Crozier, H. Zhao, P. J. Chupas and T. M. Nenoff, *Chem. Mater.* 2013, 25, 2591–2596.
36. D. F. Sava, M. A. Rodriguez, K. W. Chapman, P. J. Chupas, J. A. Greathouse, P. S. Crozier and T. M. Nenoff, *J. Am. Chem. Soc.*, 2011, 133, 12398–12401.
37. G. Mehlana, G. Ramon, S. A. Bourne, *Microporous Mesoporous Mater.* 2016, 231, 21.
38. Y. Zhu, Y. J. Ji, D. G. Wang, Y. Zhang, H. Tang, X. R. Jia, M. Song, G. Yu and G. C. Kuang, *Journal of Materials Chemistry A*, 2017, 5, 6622–6629.
39. K. C. Park, J. Cho and C. Y. Lee, *RSC Advances*, 2016, 6, 75478–75481.
40. Y. Chen, H. Sun, R. Yang, T. Wang, C. Pei, Z. Xiang, Z. Zhu, W. Liang, A. Li and W. Deng, *J. Mater. Chem. A*, 2015, 3, 87–91.
41. C. Pei, T. Ben, S. Xu and S. Qiu, *J. Mater. Chem. A*, 2014, 2, 7179–7187.
42. P. Mu, H. Sun, T. Chen, W. Zhang, Z. Zhu, W. Liang and A. Li, *Macromol Mater Eng*, 2017, 302, 1700156.
43. L. Li, R. Chen, Y. Li, T. Xiong and Y. Li, *Cellulose*, 2020, 27, 5879–5892.
44. D. F. Sava, T. J. Garino, and T. M. Nenoff, *Ind. Eng. Chem. Res.* 2012, 51, 614–620.
45. Y. Wang, G. A. Sotzing, and R. A. Weiss, *Polymer* 2006, 47, 2728.
46. M. H. Zeng, Q. X. Wang, Y. X. Tan, S. Hu, H. X. Zhao, L. S. Long, and M. Kurmoo, *J. Am. Chem. Soc.* 2010, 132, 2561.
47. Q. K. Liu, J. P. Ma, and Y. B. Dong, *Chem. Comm.* 2011, 47, 7185.
48. Z. Yin, Q. X. Wang, and M. H. Zeng, *J. Am. Chem. Soc.* 2012, 134, 4857.
49. T. Hasell, M. Schmidtman, and A. I. Cooper, *J. Am. Chem. Soc.* 2011, 133, 14920.
50. Z. M. Wang, Y. J. Zhang, T. Liu, M. Kurmoo, and S. Gao, *Adv. Funct. Mater.* 2007, 17, 1523.
51. B. J. Riley, S. Chong, J. Schmid, J. Marcial, E. T. Nienhuis, M. K. Ber, S. Lee, N. L. Canfield, S. Kim, M. A. Derewinski, and R. K. Motkuri, *ACS Appl. Mater. Interfaces* 2022, 14, 18439–18452.
52. K. W. Chapman, P. J. Chupas, and T. M. Nenoff, *J. Am. Chem. Soc.* 2010, 132, 8897.
53. P. Katsoulidis, J. He, and M. G. Kanatzidis, *Chem. Mater.* 2012, 24, 1937.
54. Haefner, D. *Methods of Gas Phase Capture of Iodine from Fuel Reprocessing Off-Gas: A Literature Survey*; Idaho National Laboratory: Idaho Falls, ID, USA, 2007.
55. B. F. Abrahams, M. Moylan, S. D. Orchard, and R. Robson, *Angew. Chem. Int. Ed.* 2003, 42, 1848.

**Disclaimer/Publisher's Note:** The statements, opinions and data contained in all publications are solely those of the individual author(s) and contributor(s) and not of MDPI and/or the editor(s). MDPI and/or the editor(s) disclaim responsibility for any injury to people or property resulting from any ideas, methods, instructions or products referred to in the content.
